# Depth-Variable Settlement Patterns and Predation Influence on Newly Settled Reef Fishes (*Haemulon* spp., Haemulidae)

Lance K. B. Jordan<sup>1\*</sup>, Kenyon C. Lindeman<sup>2</sup>, Richard E. Spieler<sup>1</sup>

**1** Oceanographic Center, National Coral Reef Institute, Nova Southeastern University, Dania Beach, Florida, United States of America, **2** Department of Education and Interdisciplinary Studies, Florida Institute of Technology, Melbourne, Florida, United States of America

## Abstract

During early demersal ontogeny, many marine fishes display complex habitat-use patterns. Grunts of the speciose genus *Haemulon* are among the most abundant fishes on western North Atlantic coral reefs, with most species settling to shallow habitats ( $\leq 12$  m). To gain understanding into cross-shelf distributional patterns exhibited by newly settled stages of grunts ( $< 2$  cm total length), we examined: 1) depth-specific distributions of congeners at settlement among sites at 8 m, 12 m, and 21 m, and 2) depth-variable predation pressure on newly settled individuals (species pooled). Of the six species identified from collections of newly settled specimens ( $n = 2125$ ), *Haemulon aurolineatum* (tomtate), *H. flavolineatum* (French grunt), and *H. striatum* (striped grunt) comprised 98% of the total abundance; with the first two species present at all sites. Prevalence of *H. aurolineatum* and *H. flavolineatum* decreased substantially from the 8-m site to the two deeper sites. In contrast, *H. striatum* was absent from the 8-m site and exhibited its highest frequency at the 21-m site. Comparison of newly settled grunt delta density for all species on caged (predator exclusion) and control artificial reefs at the shallowest site (8-m) revealed no difference, while the 12-m and 21-m sites exhibited significantly greater delta densities on the caged treatment. This result, along with significantly higher abundances of co-occurring piscivorous fishes at the deeper sites, indicated lower predation pressure at the 8-m site. This study suggests habitat-use patterns of newly settled stages of some coral reef fishes that undergo ontogenetic shifts are a function of depth-variable predation pressure while, for at least one deeper-water species, proximity to adult habitat appears to be an important factor affecting settlement distribution.

**Citation:** Jordan LKB, Lindeman KC, Spieler RE (2012) Depth-Variable Settlement Patterns and Predation Influence on Newly Settled Reef Fishes (*Haemulon* spp., Haemulidae). PLoS ONE 7(12): e50897. doi:10.1371/journal.pone.0050897

**Editor:** Simon Thrush, National Institute of Water & Atmospheric Research, New Zealand

**Received:** August 28, 2012; **Accepted:** October 26, 2012; **Published:** December 14, 2012

**Copyright:** © 2012 Jordan et al. This is an open-access article distributed under the terms of the Creative Commons Attribution License, which permits unrestricted use, distribution, and reproduction in any medium, provided the original author and source are credited.

**Funding:** This manuscript is a result of research partially funded by the National Oceanic and Atmospheric Administration Coastal Ocean Program under an award to Nova Southeastern University for the National Coral Reef Institute (NCRI). The funders had no role in study design, data collection and analysis, decision to publish, or preparation of the manuscript. No additional external funding was received for this study.

**Competing Interests:** The authors have declared that no competing interests exist.

\* E-mail: Lance@microwavetelemetry.com

‡ Current address: Microwave Telemetry, Inc., Columbia, Maryland, United States of America

## Introduction

For many coastal fish species, larval settlement occurs in shallow areas spatially separated from those typically occupied by adult conspecifics, with species of grunts (Haemulidae) and their predators (Lutjanidae) as frequent examples [1,2]. The process of utilizing multiple habitats during early life-history stages is commonly referred to as an ontogenetic habitat shift [3]. Individuals settling to shallow areas may be exposed to lower mortality and increased growth rates, with subsequent recruitment to offshore adult populations representing an important source of replenishment [4,5]. Refuge from predation affects mortality on settlement stages of coral reef fishes, influencing adult population sizes and altering overall community structure [6–9]. It has been suggested that nearshore, back-reef habitats such as seagrass beds and mangroves support high densities of new settlers by providing size-appropriate refuge and increased prey availability (e.g., [10]).

Grunts of the genus *Haemulon* (15 western Atlantic species) can represent a major component of many Greater Caribbean coral reef fish communities and support important fisheries throughout the region [11–16]. A wide array of studies have focused on

settlement or early juvenile habitat use in grunts (studies include but are not limited to [2,6,17–30]). Morphological and ecological transitions among larval, early settlement, and early juvenile life-history stages of grunts are more complicated than in many other reef fish families [31,32]. Grunts settle earlier than many other reef fish genera in terms of both size [23,33] and age [18,34]. Before the acquisition of species-specific stripe and caudal spot pigment patterns of early juveniles (approximately 2 to 5 cm in length), species-level identifications typically require microscopic examination using meristic, morphometric, and pigment characters [32]. Many grunts can form high-density, multispecies schools at settlement, which can reduce mortality [35,36] but identification challenges have often limited species-level ecological research on settlement-stage individuals.

Year-round settlement of some prominent grunt species occurs to reef and other shallow natural habitats (e.g., seagrass beds, mangroves, hardbottom, patch reefs, rubble zones, and reef pavements) [6,23,28,37–40]. Additionally, artificial reefs (ARs) in the wider Caribbean can support high densities of early-stage and juvenile grunts [20,28,41–46]. In southeast mainland Florida,

newly settled grunts were recorded at substantially higher densities on concrete ARs than on a nearby reef which had the highest densities of any natural reef habitat in the area [47,48]. Consistent with results of other studies that recorded early juvenile and juvenile stages of many grunt species in shallow-water habitats [23,49,50], examination of data from the continuous natural reef tracts throughout Broward County, Florida revealed that the abundance of early-stage (<5 cm SL) individuals was limited to depths <12 m [15,28]. However, on ARs (including vessel reefs and small [ $\sim 1 \text{ m}^3$ ] experimental units), high densities of early-stage grunts have been recorded at 21 m depth [46,51]. The presence of early-stage grunts at depths >12 m suggests the use of shallow habitats at settlement is not obligatory for some species of *Haemulon*, especially when artificial structures are present.

Adult population densities of reef fishes may vary with distance from settlement and juvenile habitats. For several *Haemulon* species in the Caribbean, reefs in close proximity to mangroves and seagrass beds exhibited higher adult abundances than reefs spatially isolated from recruit source habitats [52]. Comparisons of new settler and juvenile densities have also revealed that many species utilize back-reef habitats rather than windward coral reefs typically occupied by the adult reproductive population segment [30]. Lower predation rates on back-reef habitats utilized by early-stage fishes could, in part, explain the cross-shelf, age-structured distributional patterns observed in many species [21,53–55]. However, in most studies that compare predation among different habitat types, experimental designs were not able to address potentially confounding factors associated with among-habitat variations in depth, distance to the reef, topographic complexity, benthic fauna, and other biophysical factors; all of which can influence predator-prey interactions.

Several studies have examined how reef fish assemblages respond to differences in predation pressure and topographic complexity using ARs [41,45,56]. Fish abundance and species richness may correlate to reef area/volume, rugosity, isolation distance, and elevation, while variations in benthic fauna influence fish assemblage structure of reefs [48,57–60]. Experimental manipulations that use ARs to remove or reduce the confounding effects of these factors allow much sharper focus on specific processes. To investigate potential factors responsible for the cross-shelf distributions of newly settled stages of *Haemulon* species in southeast Florida, we examined 1) settlement patterns at the species-level using ARs deployed at three discrete depths and 2) depth-specific differences in relative predation pressure on new settlers by comparing caged versus control AR treatments at each depth, while simultaneously measuring the abundance of co-occurring predators.

## Materials and Methods

### Ethics Statement

Sampling was conducted under Florida Fish and Wildlife Conservation Commission Special Activity License 06SR-982 and 06SR-978.

### Study Area and Sites

In order to minimize variability of habitat structure and associated ecological processes among depth treatments, three sites located on sand plains between nearly continuous reef tracts that parallel the shore of Broward County, Florida, USA were chosen [61]. The study sites lie at water depths of 8 m, 12 m, and 21 m (Fig. 1) and were located at almost the same latitude (8-m: 26°07.4 N, 80°05.8 W; 12-m: 26°07.6 N, 80°05.3 W; and 21-m: 26°07.5 N, 80°04.9 W). At each of the three sites, a 4×4 grid of

ARs was chosen in which ARs were separated by approximately 30 m. The 30-m spacing was selected based on previous studies in the area which showed this distance adequately minimized movements of resident fishes among ARs and was short enough that, given typical horizontal visibility for the area, divers could efficiently navigate the grid using compass headings [45,48]. All replicate ARs were >30 m from any natural reef structure. Sandy plain habitats in the area are generally flat and homogenous in terms of structure.

### Replicate Artificial Reefs

Forty-eight replicate ARs (Gilliam-Spieler reefs; *sensu* [28]) at three sites (16 each) were used in the present study (Fig. 2A). The ARs were  $\sim 1 \text{ m}^3$  (L×W×H; 100 cm×100 cm×96 cm) cubes constructed using concrete block amalgamated with cement and reinforced with steel rods (rebar), weighing  $\sim 1.5$  tons prior to deployment. Each AR contained four layers separated by nine support columns. The void space, rugosity, and overhangs created by the design of the ARs are used by newly settled grunts in addition to other species. The flat, vertical sides of the ARs used in this study allowed for fastening of plastic netting material to exclude larger fishes (potential early-stage *Haemulon* predators) from the internal structure (Fig. 2B). All ARs were initially deployed in early 1995 and remained submerged.

Eight of the 16 ARs, at each of the three sites, were randomly chosen for the caged treatment during each experimental trial. For the caged treatment, four  $\sim 1 \text{ m}^2$  sections of 1.9 cm (3/4") polyethylene mesh netting were fastened to vertical sides of an AR to limit piscivore access. Two bungee cords secured the netting around the top and bottom layers of each of the four vertical sides of the AR. The vertical corner edges of the netting were joined together using cable ties. Prior to the start of the experiment, large encrusting organisms (e.g., oysters, bryozoans, etc.) were removed from the vertical surfaces of ARs so the netting would fit directly against the vertical sides without gaps.

### Study Design and Data Collection

Previous examination of temporal settlement patterns of grunts in this area showed highest settlement in summer months [28]. Based on McFarland et al. (1985) [23], experimental trials bracketed the quarter moon phases (waxing and waning) to ensure data collections captured pulses of newly settled stages of grunts. Visual surveys and specimen collections were performed every two weeks during the summer of 2006. To start the study, all fishes were removed from the ARs using rotenone. The initial clearing of fishes, and effective start of the study, took three dive days: 8–10 May 2006. The first data collection date was 22 May 2006. The final collections were conducted on 10–11 August 2006. For each experimental trial used in the analysis, all counts and collections at each site were performed within a two- to four-day period (Table 1).

In terms of multiple criteria, transitions among early-life stages of grunts are more complicated than in many reef fish families [31]. Post-flexion larvae (5–10 mm standard length, SL) can often be epibenthic with an extended demersal metamorphosis showing morphological and ecological attributes of larvae (e.g., planktivory) and, following Lindeman and Richards (2006) [32], we considered newly settled (NS) individuals to be those from 5–20 mm SL (5–10 mm: epibenthic larvae; 10–20 mm transitional new settler). In the current study, assuming direct settlement from the plankton (not secondary settlement from other habitat), the maximum age of specimens able to settle onto the ARs was theoretically limited by the number of days (14) between experimental trials. At 40

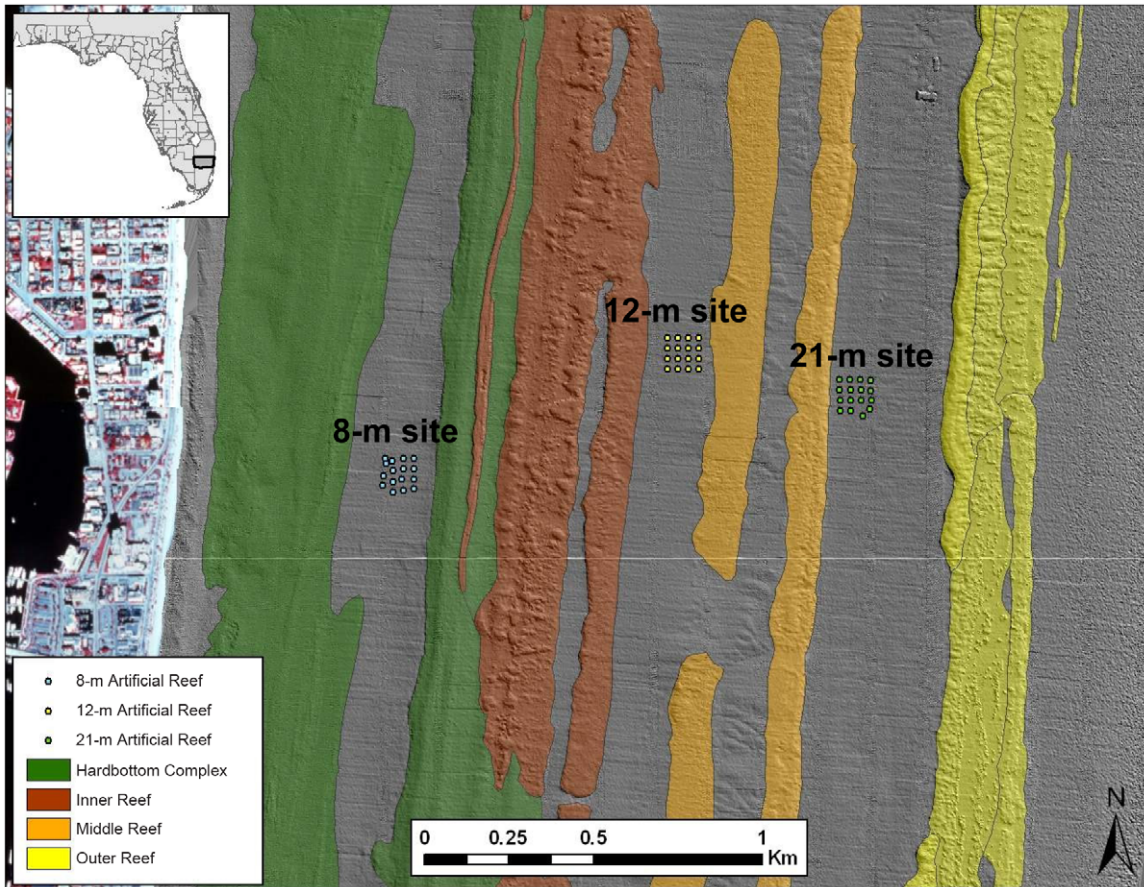

**Figure 1. Reef categorization (based on LIDAR data) of the study area (Broward County, Florida, USA) and site locations of artificial reefs.** Sand habitat in gray.  
doi:10.1371/journal.pone.0050897.g001

days, length is approximately 18 mm SL in *H. flavolineatum* [18] and other *Haemulon* species (Lindeman, unpubl. data).

Abundance of grunts was recorded using visual counts of individual ARs. All grunts located within a one-meter radius of an AR were recorded to the nearest cm total length (TL). A similar visual census method has been used in several other studies on ARs [42,45,48,62]. In addition to recording abundance of grunts, divers also recorded the abundance of species that may prey upon *Haemulon* individuals (i.e., Holocentridae, Serranidae, Apogonidae, Carangidae, Lutjanidae, and Scorpaenidae) present within one meter radius of an AR. Visual counts were not time delimited.

To examine depth-variable predation intensity of NS grunts, two treatments at each of the three sites were used. The first treatment was represented by ARs lacking the outer plastic netting on the vertical sides, hereafter the noncaged (NC) treatment. This treatment represented the control for the other treatment type, the caged (C) treatment. Plastic netting was secured to the vertical sides of the ARs of this treatment type as described above. For every experimental trial, the treatment type at each site was randomly assigned to the individual ARs to control for any influence caused by AR position within the grid. At each site, half (eight) of the 16 ARs were assigned as C while the other half were

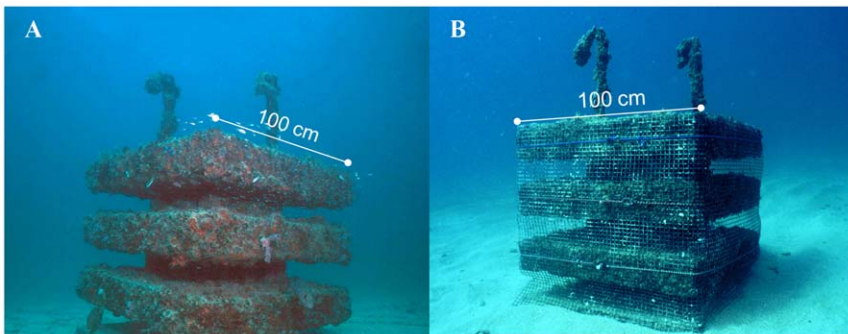

**Figure 2. Replicate artificial reefs treatments A) noncaged [NC] control and B) caged [C] to exclude predators.**  
doi:10.1371/journal.pone.0050897.g002



**Table 1.** Sampling dates of each site during respective experimental trials.

| Experimental Trial    | 8-m     | 12-m                  | 21-m    |
|-----------------------|---------|-----------------------|---------|
| Initial Fish Clearing | 5/9/06  | 5/10/06               | 5/8/06  |
| Trial #1              | 5/23/06 | 5/24/06               | 5/22/06 |
| Trial #2              | 6/6/06  | 6/7-8/06 <sup>a</sup> | 6/5/06  |
| Trial #3              | 6/22/06 | 6/21/06               | 6/19/06 |
| Trial #4 <sup>b</sup> | N/A     | N/A                   | 7/10/06 |
| Trial #5 <sup>c</sup> | 7/25/06 | 7/26/10               | 7/24/06 |
| Trial #6              | 8/11/06 | 8/11/06               | 8/10/06 |
| Trial #7 <sup>d</sup> | 8/21/06 | 8/21/06               | 8/21/06 |

<sup>a</sup>Required two days to conduct visual counts and collect specimens due to vessel engine failure.  
<sup>b</sup>Schedule for three weeks to account for shifting lunar phase. Rough seas did not allow for data collection at 8-m and 12-m sites. Data from 21-site used for length comparisons only.  
<sup>c</sup>No visual count data was obtained. Rotenone was applied to clear fishes for subsequent experimental trial.  
<sup>d</sup>Trial exhibited low NS grunt abundance (and occurrence) values and was used only for species distributional analysis.  
doi:10.1371/journal.pone.0050897.t001

NC. Use of these two treatments allowed for relative comparisons in predation intensity among sites. A significantly higher mean delta density (see below) of NS grunts on the C treatment relative to the NC treatment at a given site (i.e., depth) was considered to have a higher relative predation pressure than a site lacking significant difference between the two treatments. The randomized-block experimental design used in this study was meant to provide independence between successive experimental trials and an acceptable mode of interspersing the replicates; to avoid pseudoreplication [63,64].

Connell (1997) [65] suggested that a partially caged treatment could be used as an adequate control in assessment of predation impacts. Using the same AR design and caging material as the present study, Gilliam (1999) [45] assessed attraction of fishes to caged ARs by comparing a partially caged treatment (netting on two sides) to full caging and noncaged treatments (the latter two treatments were identical to those used in the present study). The results of that study showed that partial caging (predator accessible) and fully caged (predator exclusion) treatments did not significantly differ for 0–2 cm TL fishes (all species; *Haemulon* spp. represented the large majority, >95%); these treatments exhibited significantly higher abundances than the noncaged treatment. This implies the effect of the caging material on the abundance (and potential attraction) of newly settled fishes was not proportional to the amount of caging material.

After completing a visual count of an AR, NS grunts were collected by herding individuals into fine-mesh hand nets. Approximately 80% of the individuals recorded during visual counts were collected. After collection, rotenone was applied to clear fishes from the AR, establishing the effective start of the subsequent experimental trial. In addition to the grunts, apogonids (resident predators) were also affected by the piscicide. Approximately 300 g of rotenone powder (7.4%) was placed into a resealable plastic bag with approximately 240 mL of Ivory™ liquid dish soap. One bag was used for each AR. Fishes associated with the AR were enveloped in the rotenone cloud and most fishes died within five minutes. Once cleared of fishes, each AR was assigned its randomly predetermined treatment (caged or noncaged) for the subsequent fortnightly experimental trial and divers moved on to

the next AR. Upon returning to the boat, collected specimens were placed into labeled jars with 90% EtOH for preservation.

For newly settled *Haemulon* individuals, *in situ* species-level identification when total length was <2 cm TL was usually not possible. Species identification for collected specimens was performed in the laboratory using Lindeman and Richards (2006) [32]. Once identified to species, specimens were measured to the nearest 0.01 mm standard length (SL). Because some collection samples contained thousands of specimens, subsampling techniques were used. For each experimental trial, samples from four ARs from each of the three sites (depths) were randomly chosen for species identification and length measurement. Collections from two caged and two noncaged ARs were represented in the four selected samples from each site. Individual samples were then subsampled volumetrically using a Folsom splitter. A subsample containing approximately 80 specimens was used to represent the species composition and length frequency of the raw sample.

**Statistical Analysis**

Previous studies on both natural reef and ARs have shown that NS stages of grunts exhibit a spatially and temporally patchy distribution [45,47,48]. Frequency-distribution histograms (not shown) revealed highly right-skewed abundance data in which zero values were common. This patchy distributional pattern is common in visual fish surveys and can cause extremely high variability among replicate samples with corresponding mean abundances exhibiting statistically high variances [66,67] in which parametric statistics are unlikely to appropriately resolve among-factor differences. Thus, NS *Haemulon* spp. abundance data collected in visual counts were analyzed using the delta approach [68,69].

To calculate delta density of newly settled grunts for each factor, all zero data were removed from raw abundances (hereafter, concentration; conc). A frequency-distribution histogram was constructed which showed that the data were still highly right (positively) skewed. A log<sub>10</sub>(x+1) transformation was applied to meet the assumptions of analysis of variance (ANOVA). If a significant difference (p<0.05) was detected, a modified Tukey HSD test (for unequal sample size) was performed to determine differences among variables. Percent presence (i.e., occurrence; occ) data were also calculated for each factor; either NS *Haemulon* were present on an AR or they were not. To compare occurrence data among the three sites and between treatments at each site (pooling all experimental trials) a Kruskal-Wallis nonparametric ANOVA was performed. If significant (p<0.05), a nonparametric multiple comparisons test was run to identify among-site differences. A Mann-Whitney U test was used to compare occurrence data of C and NC treatments overall (pooling all experimental trials and sites). A Fisher’s exact test (two-tailed p-value) was used to corroborate factor differences identified in nonparametric multiple comparisons test (from Kruskal-Wallis and Mann-Whitney tests).

Delta density is a composite density represented by the product of occurrence (the proportion of zero to non-zero values) and concentration (mean abundance after removal of all zeros). For each site, treatment, and site/treatment combination delta density (D) was calculated enabling comparison between C and NC replicate reefs at each site. The product of concentration (conc) and occurrence (occ) was calculated for each site, treatment, and site/treatment combination to yield indices of relative density represented by delta density. It has been suggested that delta density is a better representation than conventionally calculated mean density because the latter can have a large variance due to

the presence of zero values [70]. Statistical comparisons of delta density would not be possible without an error term. Estimated delta density variance (var) can be calculated using a Taylor approximation [71]. Approximated delta density variance was calculated through the product of the square of occurrence and the variance of concentration:

$$\text{var}(D) = \text{var}(\text{conc}) \times \text{occ}^2$$

Once the estimated variances (and standard deviations) for delta densities were calculated, it was possible to statistically compare delta density between pairs of sites, treatments, and treatments at each site using a difference test (t-test). This was achieved by using “difference between two means” test (Statistica, Statsoft, Inc.) in which means (represented by delta density of a factor) and corresponding approximated standard deviations were entered to calculate a two-tailed p-value.

Additionally, the abundance of predatory fishes (based on visual census of individual ARs) was compared using a three-way ANOVA with experimental trial, sites, treatments as factors. A  $\log_{10}(x+1)$  transformation was applied to raw abundance data to meet the assumptions of analysis of variance (ANOVA). If a significant difference ( $p < 0.05$ ) was detected, a Tukey HSD *post hoc* analysis was used to identify the differences among variables.

## Results

### Species-Specific Depth Patterns at Settlement

A total of 2125 newly settled (NS) *Haemulon* species (<20 mm SL) collected from ARs was identified to the species level. This subsample represented ~24% of the total abundance of NS grunts recorded from the visual counts of the ARs. Six species were collected: *Haemulon aurolineatum* (tomtate), *H. flavolineatum* (French grunt), *H. striatum* (striped grunt), *H. melanurum* (cottonwick), *H. parra* (sailors choice), and *H. plumieri* (white grunt). Only the first three species were abundant enough to warrant further examination of depth/site settlement distribution.

Data for individual species, standardized by sample size (mean species contribution per sample at each site, pooling all experimental trials), revealed *H. aurolineatum* as the predominate species collected in this study (Fig. 3). At the 8-m site, *H. aurolineatum* ([mean  $\pm$  SE]  $44.6 \pm 6.5$ ) and *H. flavolineatum* ( $52.0 \pm 6.7$ ) exhibited similar percent contributions (per sample). However, mean percent contribution for *H. aurolineatum* was two times greater than *H. flavolineatum* at the 12-m and 21-m sites. At the 21-m site, *H. aurolineatum* exhibited a mean percent sample contribution of approximately 35%. Although 98% of NS *H. striatum* were collected at the 21-m site, its mean percent contribution only accounted for 45.6% ( $\pm 0.07$ ) of the samples collected at this site.

*Haemulon aurolineatum* and *H. flavolineatum* were found at all three sites and exhibited depth-related differences in their distributions (Fig. 4). Of the *H. aurolineatum* specimens collected, 49% were found at the 8-m site while 26% and 24% were recorded from samples at the 12-m and 21-m sites, respectively. Similarly, at the 8-m site, 71% of all *H. flavolineatum* specimens were collected. The remainder of specimens was collected at nearly equal relative abundance (~14%) from the 12-m and 21-m sites. In contrast to these two species, *H. striatum* was collected on the 12-m and 21-m sites only; with ~98% present on the deepest site. The remaining species were not abundant: NS stages of *H. parra* and *H. plumieri* were found exclusively at the 8-m site (13 and 3 individuals, respectively), while 18 NS *H. melanurum* were found at the 12-m and 21-m sites only.

### Among-Site Comparison of Settlement and Predation

**Settlement of *Haemulon* Species.** A total of 8842 newly settled grunts was included in the following analyses of visual count data. Grunts were patchily distributed among ARs resulting in heavily right-skewed abundance data, inappropriate for parametric statistics. Utilization of the delta approach required calculation of concentration and occurrence in order to obtain delta density values. A three-way ANOVA using concentration (i.e., abundance after removal of zeros;  $\log_{10}[x+1]$  transformed) of NS grunts revealed significant differences for experimental trial, treatment, and the site by treatment interaction term (Table 2). A Tukey HSD test revealed that the significant difference in concentration of NS grunts that occurred for the site  $\times$  treatment interaction resulted from a difference between the 12-m NC replicate reefs and C replicate reefs at the 12-m and 21-m sites. None of the other site/treatment combinations differed from one another. A Tukey HSD test for unequal sample size also revealed more consistency in concentration of NS grunts among experimental trials than seen for abundance. The caged AR treatment exhibited a significantly greater concentration than noncaged ARs (pooling experimental trials and sites). Experimental trial #2 had a significantly lower concentration than experimental trials #1 and #3. Experimental trial #6 did not differ from any of the others (Table 2).

Analysis of occurrence (i.e., the percentage of ARs on which NS grunts were recorded) was performed using Kruskal-Wallis nonparametric ANOVAs and revealed significant differences among sites ( $df = 2$ ,  $p = 0.003$ ) and experimental trials ( $df = 3$ ,  $p < 0.0001$ ). Comparison between the C and NC treatments (pooling experimental trials and sites) showed no significant overall difference in occurrence (Mann-Whitney  $U = 4224.0$ ,  $p = 0.243$ ). However, comparison between caged and noncaged ARs at each site revealed a significant higher occurrence on caged ARs at the 12-m site ( $U = 368.0$ ,  $p = 0.024$ ), with no difference detected between treatment at either the 8-m or 21-m sites. For sites, a *post hoc* multiple comparisons test revealed that the 8-m site exhibited a significantly higher occurrence than the 12-m site. Neither of these two sites differed from the 21-m site. A *post hoc* multiple comparisons test showed that experimental trial #3 had a significantly higher occurrence of NS grunts than experimental trial #6, with no differences among the remaining experimental trials.

No significant difference was found for delta density of NS grunts between any pair of sites (i.e., 8-m vs. 12-m, 8-m vs. 21-m, 12-m vs. 21-m). Comparison of delta densities for C ( $51.35 \pm 0.99$ ) and NC ( $26.32 \pm 0.62$ ) treatments (pooling data from all experimental trials and sites) revealed significantly higher values for the C treatment ( $p = 0.014$ ). For treatment comparisons at each site, no significant difference was found between the treatments at the 8-m site ( $p = 0.241$ ). However, the C treatment exhibited significantly higher delta densities than NC treatment at the 12-m ( $p = 0.034$ ) and 21-m ( $p = 0.046$ ) sites (Fig. 5).

**Piscivore Distributions.** Recording potential predators of NS grunts during visual counts at the ARs allowed for comparison of piscivore distributional trends across the shelf. Potential predators included species within several families: Holocentridae, Serranidae, Apogonidae, Carangidae, Lutjanidae, and Scorpaenidae. The five most abundant predators of NS grunts were: *Apogon pseudomaculatus* (twospot cardinalfish, Apogonidae), *Diplec-trum formosum* (sand perch, Serranidae), *Caranx crysos* (blue runner, Carangidae), *Lutjanus analis* (mutton snapper, Lutjanidae), and *Cephalopholis cruentata* (graysby, Serranidae). A three-way ANOVA of piscivorous fish abundance (all species combined,  $\log_{10}[x+1]$  transformed) revealed a significant difference among experimental trials and sites (Table 3). A Tukey HSD test indicated mean

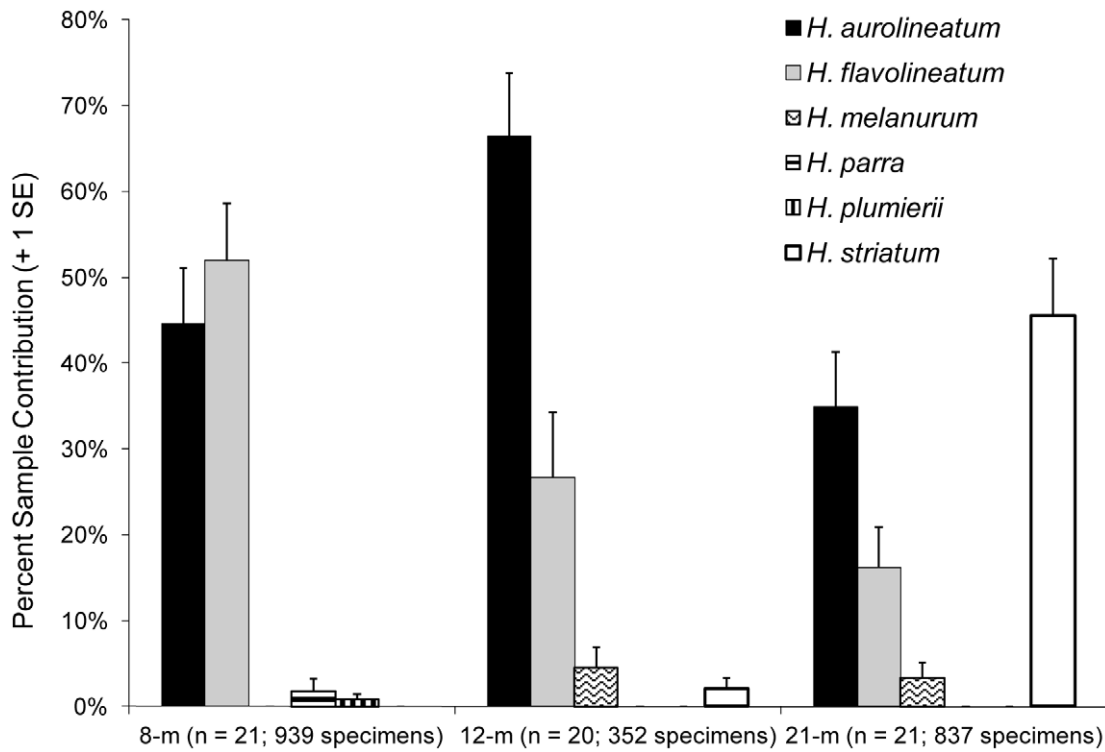

**Figure 3. Mean percent sample contribution for newly settled stages of each *Haemulon* species.** Data pooled for experimental trials and treatments.  
doi:10.1371/journal.pone.0050897.g003

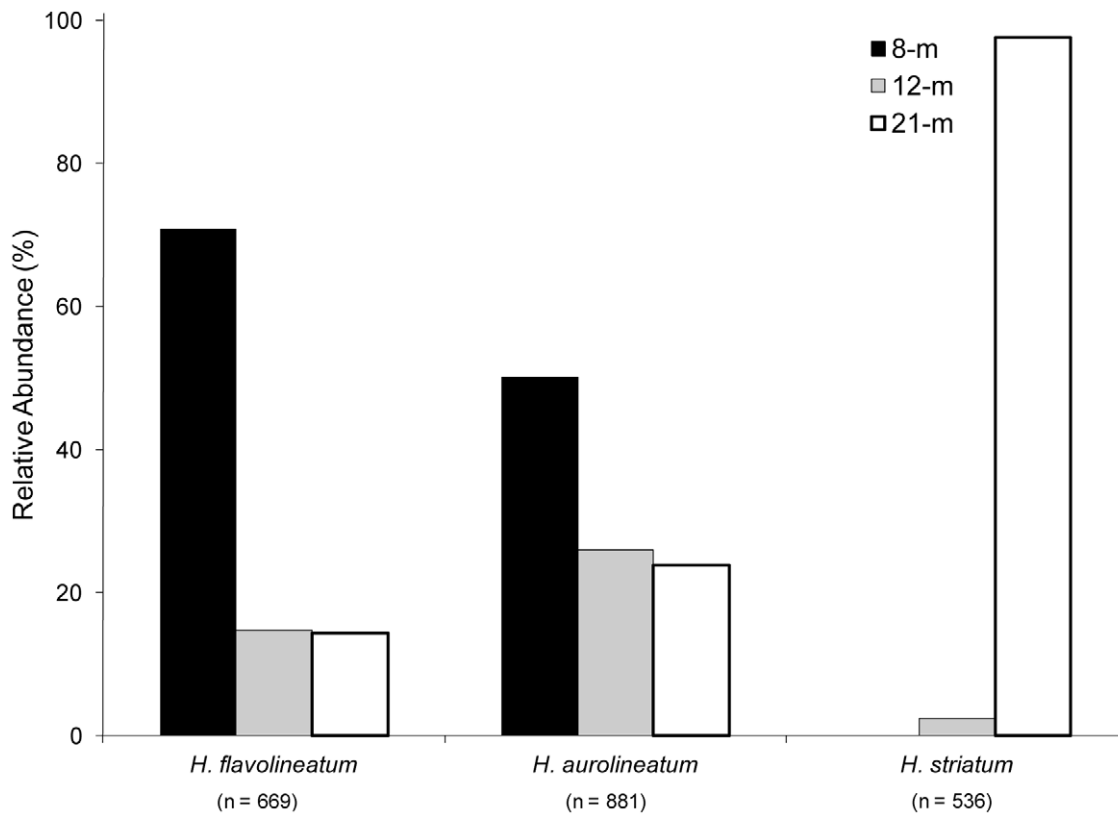

**Figure 4. Relative abundance of species of *Haemulon* at each site, based on specimen totals from collections of new settlers on ARs (pooling all experimental trials).**  
doi:10.1371/journal.pone.0050897.g004

**Table 2.** Results from 3-way ANOVA on NS grunt concentration (i.e., abundance after removal of zeros;  $\log_{10}[x+1]$  transformed).

| Source                            | df | SS    | MS    | F      | p      |
|-----------------------------------|----|-------|-------|--------|--------|
| Site – Depth                      | 2  | 0.320 | 0.160 | 0.632  | 0.534  |
| Treatment                         | 1  | 2.582 | 2.582 | 10.210 | 0.002* |
| Experimental trial                | 3  | 3.275 | 1.092 | 4.317  | 0.007* |
| Experimental trial×Site           | 6  | 2.610 | 0.435 | 1.720  | 0.126  |
| Experimental trial×Treatment      | 3  | 0.990 | 0.330 | 1.305  | 0.278  |
| Site×Treatment                    | 2  | 2.869 | 1.435 | 5.672  | 0.005* |
| Experimental trial×Site×Treatment | 6  | 1.330 | 0.222 | 0.877  | 0.516  |

Due to low abundances, experimental trial #7 was excluded from this analysis. P-values with asterisk (\*) indicate significant difference. doi:10.1371/journal.pone.0050897.t002

piscivorous fish abundance was significantly lower on the 8-m site, with the other two depths exhibiting no difference (Table 4). No significant difference in overall piscivorous fish abundance between C and NC treatments (pooling all sites and experimental trials) was found ( $F = 0.47$ ,  $p = 0.49$ ).

For *A. pseudomaculatus*, the most abundant piscivorous species recorded, results of a three-way ANOVA mirrored the among-site abundance pattern (and Tukey HSD significance levels) exhibited by all piscivorous species combined ( $F_2 = 20.64$ ,  $p < 0.001$ ; Table 4).

**Table 3.** Results from 3-way ANOVA of piscivorous fish abundance (all species combined,  $\log_{10}[x+1]$  transformed).

| Source                            | df | SS     | MS    | F      | p       |
|-----------------------------------|----|--------|-------|--------|---------|
| Site – Depth                      | 2  | 10.059 | 5.030 | 46.764 | <0.001* |
| Treatment                         | 1  | 0.050  | 0.050 | 0.469  | 0.494   |
| Experimental trial                | 4  | 1.459  | 0.365 | 3.391  | 0.010*  |
| Experimental trial×Site           | 8  | 1.112  | 0.139 | 1.293  | 0.249   |
| Experimental trial×Treatment      | 4  | 0.131  | 0.033 | 0.306  | 0.874   |
| Site×Treatment                    | 2  | 0.137  | 0.069 | 0.639  | 0.529   |
| Experimental trial×Site×Treatment | 8  | 1.013  | 0.127 | 1.178  | 0.314   |

Data from experimental trial #7 included. P-values with asterisk (\*) indicate significant difference. doi:10.1371/journal.pone.0050897.t003

A three-way ANOVA of *D. formosum*, the most prevalent (i.e., highest occurrence and second-most abundant) piscivore recorded in this study also revealed a significant difference in abundance among sites ( $F_2 = 56.14$ ,  $p < 0.001$ ). However, for this species, a Tukey HSD test showed that its abundance was significantly higher at the 12-m site than the 8-m and 21-m sites, which did not differ from each other (Table 4).

A total of 180 *C. cyosos*, a transient predator, was recorded in 47 of the 240 AR counts. On the 12-m and 21-m sites, *C. cyosos* exhibited mean abundances greater than 1.0; significantly greater

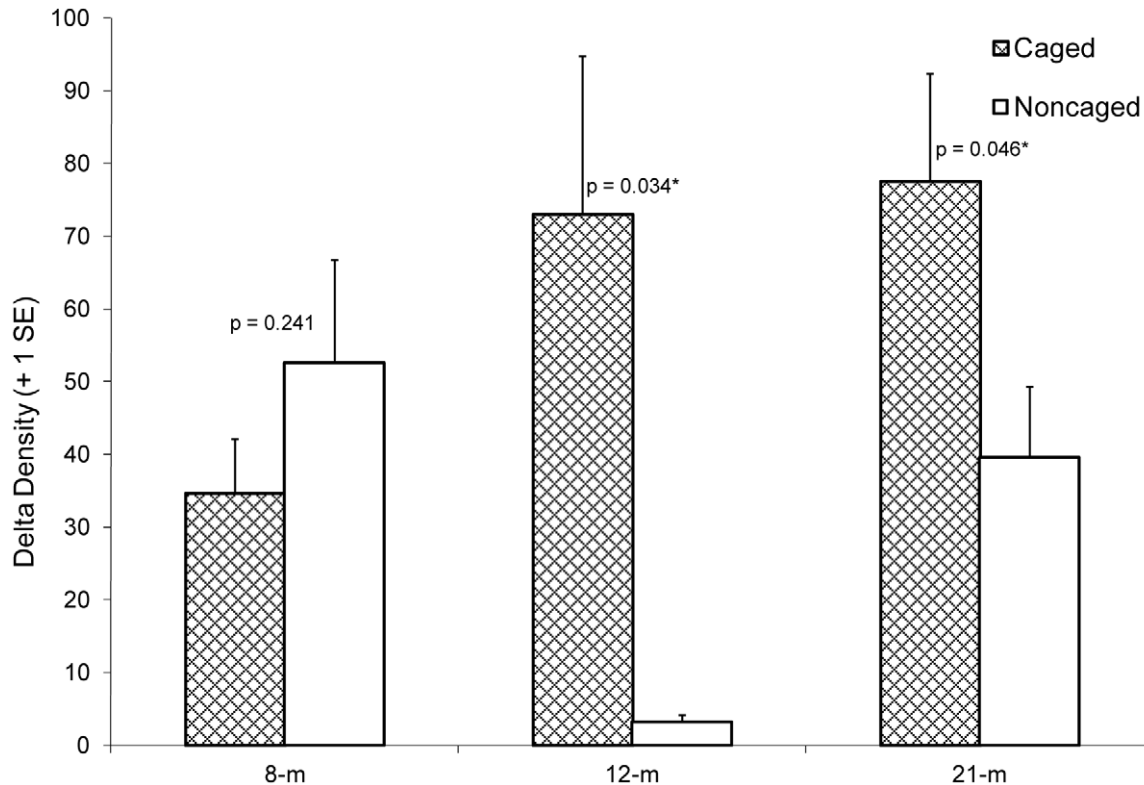

**Figure 5.** Mean delta density of newly settled stages of *Haemulon* species on the caged and noncaged ARs at each site. P-values obtained from comparison of caged and noncaged ARs for each site (difference between two means test). Significant p-values between treatments at a site denoted with asterisk (\*). doi:10.1371/journal.pone.0050897.g005

**Table 4.** Mean piscivore abundance ( $\pm$  SE) on ARs (pooling both treatments using data from all experimental trials) at the three study sites.

| Species                        | 8-m                          | 12-m                         | 21-m                         |
|--------------------------------|------------------------------|------------------------------|------------------------------|
| <i>Apogon pseudomaculatus</i>  | 0.31 $\pm$ 0.09 <sup>b</sup> | 3.04 $\pm$ 0.53 <sup>a</sup> | 2.61 $\pm$ 0.49 <sup>a</sup> |
| <i>Diplectrum formosum</i>     | 0.50 $\pm$ 0.10 <sup>b</sup> | 1.71 $\pm$ 0.18 <sup>a</sup> | 0.28 $\pm$ 0.09 <sup>b</sup> |
| <i>Caranx crysos</i>           | 0.06 $\pm$ 0.04 <sup>b</sup> | 1.16 $\pm$ 0.44 <sup>a</sup> | 1.01 $\pm$ 0.23 <sup>a</sup> |
| <i>Lutjanus analis</i>         | 0.13 $\pm$ 0.04              | 0.13 $\pm$ 0.04              | 0.30 $\pm$ 0.08              |
| <i>Cephalopholis cruentata</i> | 0 <sup>b</sup>               | 0.03 $\pm$ 0.02 <sup>b</sup> | 0.28 $\pm$ 0.05 <sup>a</sup> |
| Total*                         | 1.34 $\pm$ 0.19 <sup>b</sup> | 6.59 $\pm$ 0.66 <sup>a</sup> | 5.33 $\pm$ 0.63 <sup>a</sup> |

Differing letters indicate significant differences between sites using log-transformed data ( $\log_{10}(x+1)$ ) (Tukey HSD,  $p < 0.05$ ).  
 \*Based on all potential predators of newly settled stages of *Haemulon* species (see Methods).  
 doi:10.1371/journal.pone.0050897.t004

than the 8-m site ( $F_2 = 9.18$ ;  $p < 0.001$ ; Table 4). Large schools (containing hundreds of individuals) of *C. crysos* made passes by the ARs, frequently extended beyond the one-meter radius around the AR in which abundance data from visual surveys were recorded. It is likely that abundance (and percent presence) data collected during visual counts did not adequately represent the foraging behavior exhibited by this species.

**Discussion**

**Depth-Specificity of Settlement among Congeners**

Many reef fishes exhibit age-structured, cross-shelf distributional patterns whereby new settlers and juveniles utilize different habitat(s) than adult conspecifics [1,72,73]. Use of shallow habitats by new settlers implies that an advantage exists in differential habitat use. Several studies have demonstrated that utilization of shallow habitats by juvenile and newly settled individuals can reduce predation rates by providing size-appropriate structural complexity, which reduces predator foraging efficiency [54,74]. Predation refuge provided by structural complexity may vary among species [75,76] and may, in part, explain demographic differences in habitat-use patterns. Our results revealed varying settlement distributions among closely related species within the genus *Haemulon*.

Factors that influence depth and habitat specificity at settlement and the possible roles of predation remain poorly understood. Studies attempting to examine these factors are often confounded by within-habitat variation. In this study, collections and laboratory identification of 2125 newly settled individuals (i.e., epibenthic larvae) from ARs placed at similar sites at three depths (8 m, 12 m, and 21 m) indicated the most abundant species (*H. aurolineatum*, *H. flavolineatum*, and *H. striatum*) exhibited overlapping, yet distinct, distributional patterns. NS *H. aurolineatum* and *H. flavolineatum* were collected at all sites while *H. striatum* was collected at the 12-m and 21-m sites only (98% at the deepest site). Abundances of *H. aurolineatum* and *H. flavolineatum* were almost equal at the shallowest site, with the former species exhibiting comparatively higher abundance at the two deeper sites (Fig. 4).

The analogous depth distribution of settlement stage *H. aurolineatum* and *H. flavolineatum* seen in this study also reflects highly similar morphological adaptations, as new settlers and early juveniles share nearly identical pigmentation, eye size, and body shape [33]. Evidence suggests that all species of *Haemulon* feed on

plankton during post-settlement stages [19,32,77]. Through ontogeny, individuals of *H. flavolineatum* become benthic carnivores as adults. However, juvenile and subadult *H. aurolineatum* often continue to feed diurnally on zooplankton while adults feed on both zooplankton and benthic prey [78]. The comparatively deep settlement of *H. striatum* likely reflects distinct ecological and morphological adaptations. This species is a highly specialized obligate planktivore throughout its life history, inhabiting the water column of deep reefs [78–80]. Settlement to relatively deep, offshore areas with more consistent availability of planktonic food resources could position individuals to grow faster, which can lower mortality rates [81–83]. Variability in food resources is unlikely to explain the species-specific distributional patterns within the genus since all species of *Haemulon* feed on plankton as new settlers [84]. For *H. flavolineatum* in Aruba and Curaçao, despite greater food abundance and corresponding faster growth rates of individuals exposed to offshore reef habitats, mangroves and seagrasses remained the predominant settlement habitats [29].

Because several species (which typically settle to shallow habitats) were capable of settlement on ARs in relatively deep waters, the possibility exists that the lack of NS grunts on deeper natural reefs >21 m [28] is indicative of 100% mortality at (or immediately following) settlement. However, the similar delta densities of new settlers (consisting of three primary species) on ARs at all three sites does not support this assumption. While differences in predation pressure among sites could be attributed to differences in predatory species composition and relative abundance, predation does not appear to be the only factor driving the distributional patterns of new settlers. Subsamples of collected specimens revealed that, while *H. aurolineatum* and *H. flavolineatum* settled at lower densities on the 21-m site than the 8-m site, *H. striatum* was never collected at the shallowest site. For *H. striatum*, settlement occurred at depths in closer proximity to adults or adult habitat, which may reduce mortality during subsequent habitat shifts. This implies that the ecological advantage gained by settling to deeper reefs (with higher pressure, see below) may outweigh the benefit of settlement to shallow habitats with potentially less predation pressure.

**Depth-Variable Predation Effects on the Cross-shelf Distribution of New Settlers**

To gain understanding of how depth-variable post-settlement predation affects the distribution of newly settled individuals, the difference in NS grunts (all species) delta density between the C and NC treatments was used as a measure of relative predation pressure. The difference at each site was then compared among the 8-m, 12-m, and 21-m sites. While analysis revealed no among-depth difference in NS grunt delta density (see above), results of the caging experiment revealed higher relative predation pressure on NS grunts at the deeper sites. This pattern is likely to reflect conditions of the surrounding natural reef system. Larger (more consumptive) predators are likely to be more abundant in topographically complex (e.g., elevation, rugosity, volume, etc.) habitats [85].

In the reef system surrounding the study sites, several distinct hardbottom reef habitats are separated by sandy plains [61]. The nearshore ridge complex (NRC) habitat, adjacent to the 8-m site, exhibited the highest abundance of NS grunts relative to the other surrounding natural reef habitats (Jordan et al., in prep). Despite the high density of NS grunts, of the three reef habitat categories examined in Walker et al. (2009) [60], the NRC had lowest total fish abundance and species richness while also exhibiting lowest values of habitat elevation (m), volume (m<sup>3</sup>), surface rugosity index, and linear-rugosity index. Similarly, Almany (2004) [86] found



that new settler abundance did not differ among reefs with varying topographic complexities. While size-appropriate refugia (topographic complexity, rugosity, etc.) for NS grunts may exist on deeper reefs in the area, the shelter characteristics of the shallow reefs may be less suitable for larger fishes and predators. The potentially size-appropriate refugia present in deeper reef habitats could simultaneously increase predation pressure on prey species [87].

Predation vulnerability has been shown to vary among prey species [88]. While this study was not designed to resolve variations in mortality among congeners, the different distributional patterns observed could be attributed to a species-specific response to predation pressure. Disproportionately higher predation pressure on newly settled *H. aurolineatum* and *H. flavolineatum* at the deeper sites would explain declining offshore abundances of these species. In contrast, *H. striatum* may have exhibited comparatively low mortality at the deepest site. Due to the underlying differences of the reef types, it is impossible to directly ascribe the findings of the caged-versus-noncaged treatment effects using ARs located at different depths to the surrounding natural reef system. Structural or biological attributes of the ARs absent from natural reefs (and *vice versa*) may allow *H. aurolineatum* and *H. flavolineatum*, normally associated with the shallow habitats, to settle to deeper areas. The structural complexity of the ARs used in this study (relative to natural reef) may have reduced priority effects and provided more size-appropriate refuge for newly settled individuals while negatively influencing the success rate of predatory strikes, relative to natural reef habitat [20,86,89–92]. Despite this difference, only the use of replicate artificial reef units (positioned on nearly identical habitat) could allow for an unconfounded examination of depth-variable predation pressure.

The mortality risk associated with undergoing ontogenetic habitat shifts are thought to outweigh the benefit gained by remaining in the settlement habitat [3]. The findings of Dahlgren and Eggleston (2000) [4] supported this assertion and suggested that ontogenetic habitat shifts minimize the ratio of mortality risk to growth rate. Such shifts in habitat use appear to provide a means of balancing predation (driven by appropriate refuge or predator abundance) and suitable food availability, thereby decreasing mortality. Habitat shifts, which offset the mortality risk of remaining within the former habitat, are likely to occur on a practical spatial scale. Results of our study suggest greater predation pressure on deeper reef areas and, in general, the length of time spent away (and distance travelled) from refuge is related to mortality risk [93]. Thus, the deep settlement of *H. striatum* appears to be driven by accessibility to habitat needed during subsequent life-history stages, which inhabit deep fore reef areas to feed on relatively plankton-rich waters. The other two abundant species (*H. aurolineatum* and *H. flavolineatum*) shift to a benthic feeding mode at an early age (~5 cm TL) and exhibited a broader settlement distribution that likely reflects the availability of habitats suitable for these species during subsequent life stages. Sandy areas, on which the conspecific adults often forage, are common throughout the reef tracts at all depths [61].

While results from this study suggest predation and proximity to adult conspecifics can influence new settler distribution on reefs, other factors may explain the observed patterns. Due to their common absence from plankton surveys, complex larval taxonomy, and low published abundance in light traps, understanding of species-specific *Haemulon* larval ecology is lacking [94,95]. However, larval grunts may be able to detect and react to reef noise during settlement [96]. It is also possible that settling individuals avoid areas where they have detected resident predators/competitors, as seen with other species [92]. On the natural reef

system surrounding the study area, small-bodied predators (serranids and apogonids) and territorial pomacentrids (*Stegastes* spp.) exhibited significantly lower abundances on shallow reef habitats (Jordan and Spieler, unpub. data; [15]), which opposed the distributional patterns seen for early-stage grunts [28]. Predator avoidance occurs among freshwater systems affects species distribution [97,98]. In the case of settling larvae, predator avoidance behavior would require risk assessment of species that might negatively influence their survivorship [99]. Relative to other coral reef fishes, the lack of pelagic morphological features, small settlement size, and extended duration of the epibenthic larval period of grunts suggest that larvae often may not enter the pelagic realm, potentially staying in near-bottom association with softbottom habitat during much of the larval period [31,32]. Such an early life history strategy could reduce planktonic mortality and explain the large schools of epibenthic larvae often found on the edges of shallow hardbottom structures for many species of *Haemulon*. As with many other reef fish families, research into sensory abilities of late-stage *Haemulon* larvae would be of value [100].

Although potential predators did not show higher abundances on the C treatment, which exhibited higher densities of newly settled individuals on the 12-m and 21-m sites, among-site differences in abundance were observed for *A. pseudomaculatus*, *D. formosum*, *C. crysos*, *C. cruentata*, and total piscivores (all species combined). Total potential piscivore abundance was significantly lower at the 8-m site. In general, all piscivorous species exhibited increasingly higher abundances on the offshore sites except *D. formosum* which occurred in 80% of the counts at the 12-m site, with only 35% and 20% at the 8-m and 21-m sites, respectively. Although the use of rotenone likely caused an unnatural feeding opportunity, this serranid was observed consuming early-stage grunts during rotenone sampling and has been shown to negatively affect fish recruitment on ARs [101]. The most abundant potential piscivore recorded, *A. pseudomaculatus*, was also observed feeding on NS grunts during collections. Marnane and Bellwood (2002) [102] showed that, despite their small size, fishes comprised a major dietary component of several species of Indo-Pacific apogonids. Similarly, *C. crysos* was observed feeding on NS grunts during collections, suggesting predator-prey interactions may also occur naturally. Although *C. crysos* abundance and its effect on NS grunt mortality was likely inadequately represented in the visual count data, studies have suggested carangids account for high mortality of new settlers on ARs in the Greater Caribbean [44,48,103]. Compared to other piscivores recorded in this study, its large size and schooling, chase behavior suggest that *C. crysos* would be a more consumptive predator [104]. However, the predation pressure placed upon prey NS grunts by this carangid was likely to be higher on noncaged ARs, since complete refuge from their predatory strikes could be obtained within the netting material. Thus, of the most prevalent piscivorous species recorded, it is possible that *C. crysos* may have contributed to the difference in NS grunt density between C and NC treatments at the 12-m and 21-m sites.

This study suggests that distributional patterns of NS grunts on the natural reef, in which the vast majority of individuals were recorded on nearshore habitats [28], are driven by multiple factors. Results from the comparison of C and NC treatments suggest that predation pressure was strongest at the deepest site. Although delta density of new settlers (all species) at this site did not differ from the other sites, the observed species-specific settlement patterns appear in part to reflect an ecological trade-off between predation pressure and proximity to adult conspecifics (or adult resources) for several *Haemulon* species. Depth does not

appear to be a primary determinant of settlement for the two most prevalent species observed, *H. aurolineatum* and *H. flavolineatum*, which are typically opportunistic with regard to habitat selection at settlement [24]. The high settler and juvenile densities of certain ontogenetic-shifting species commonly found in shallow habitats may be the result of lower relative predation, corresponding to the density and constituents of the piscivore suite, rather than the increased structural refuge associated with certain habitats (e.g., seagrass, mangrove, etc.). However, for species within the genus *Haemulon*, distributional patterns at settlement do not appear to be driven solely by predation pressure. At settlement, all newly settled *Haemulon* species exhibit very similar morphologies and behaviors. Evidenced by its absence from shallow habitat, *H. striatum* may gain an ecological advantage by limiting the distance needed to shift from settlement to juvenile and adult habitats; offsetting the initial benefit of settling to shallow habitats with lower relative predation pressure.

## References

- Parrish JD (1989) Fish communities of interacting shallow-water habitats in tropical oceanic regions. *Mar Ecol Prog Ser* 58: 143–160.
- Nagelkerken I (2009) Evaluation of the nursery function of mangroves and seagrass beds for reef fishes and decapods: patterns and underlying mechanisms. In: Nagelkerken I, editor. *Ecological Connectivity among Tropical Coastal Ecosystems*. Dordrecht, Netherlands: Springer Science and Business Media. pp. 357–399.
- Werner EE, Gilliam JF (1984) The ontogenetic niche and species interactions in size-structured populations. *Ann Rev Ecol Syst* 15: 393–425.
- Dahlgren CP, Eggleston DB (2000) Ecological processes underlying ontogenetic habitat shifts in a coral reef fish. *Ecology* 81: 2227–2240.
- Beck MW, Heck KL Jr, Able KW, Childers DL, Eggleston DB, et al. (2001) The identification, conservation and management of estuarine and marine nurseries for fish and invertebrates. *BioScience* 51: 633–641.
- Shulman MJ, Ogden JC (1987) What controls tropical reef fish populations: Recruitment or benthic mortality? An example in the Caribbean reef fish, *Haemulon flavolineatum*. *Mar Ecol Prog Ser* 39: 233–242.
- Hixon MA (1991) Predation as a process structuring coral reef fish communities. In: Sale PF, editor. *The Ecology of Fishes on Coral Reefs*. San Diego: Academic Press. pp. 475–508.
- Doherty PJ, Dufour V, Galzin R, Hixon MA, Meehan MG, et al. (2004) High mortality during settlement is a population bottleneck for a tropical surgeonfish. *Ecology* 85: 2422–2428.
- Almany GR, Webster MS (2006) The predation gauntlet: Early post-settlement mortality in reef fishes. *Coral Reefs* 25: 19–22.
- Laegdsgaard P, Johnson CR (2001) Why do juvenile fish utilize mangrove habitats? *J Mar Biol Ecol* 257: 229–253.
- Starck WA, Davis WP (1966) Night habits of fishes off Alligator Reef, Florida. *Ichthyol Aquar J* 38: 313–356.
- Claro R, Baisre JA, Lindeman KC, García-Arteaga JP (2001) Cuban fisheries: Historical trends and current status. In: Claro R, Lindeman KC, Parenti LR, editors. *Ecology of the Marine Fishes of Cuba*. Washington, D.C.: Smithsonian Institution Press. pp. 194–219.
- Hawkins JP, Roberts CM (2004) Effects of artisanal fishing on Caribbean coral reefs. *Conserv Biol* 18: 215–226.
- Mumby PJ, Edwards AJ, Arias-Gonzalez JE, Lindeman KC, Blackwell PG, et al. (2004) Mangroves enhance the biomass of coral reef fish communities in the Caribbean. *Nature* 427: 533–536.
- Ferro F, Jordan LKB, Spieler RE (2005) The marine fishes of Broward County, Florida: Final report of 1998–2002 survey results. NOAA Tech Memo. NMFS SEFSC-532, pp. 73.
- Ault JS, Smith SG, Luo J, Monaco ME, Appeldoorn RS (2008) Length-based assessment of sustainability benchmarks for coral reef fishes in Puerto Rico. *Environ Conserv* 35: 221–231.
- McFarland WN (1980) Observations on recruitment in haemulid fishes. *Proc Gulf Caribb Fish Inst* 32: 132–138.
- Brothers EB, McFarland WN (1981) Correlations between otolith microstructure, growth and life history transitions in newly recruited French grunts [*Haemulon flavolineatum* (Desmarest), Haemulidae]. *Rapp. P.-V. Reun., Cons. Int Explor. Mer* 178: 369–374.
- Helfman GS, Meyer JL, McFarland WN (1982) The ontogeny of twilight migration patterns in grunts (Pisces: Haemulidae). *Anim Behav* 30: 317–326.
- Shulman MJ, Ogden JC, McFarland WN, Miller SL, Wolf NG, et al. (1983) Priority effects in the recruitment of juvenile coral reef fishes. *Ecology* 64: 1508–1513.
- Shulman MJ (1985) Recruitment of coral reef fishes: Effects of distribution of predators and shelter. *Ecology* 66: 1056–1066.
- Shulman MJ (1985) Variability in recruitment of coral reef fishes. *J Exp Mar Biol Ecol* 89: 205–219.
- McFarland WN, Brothers EB, Ogden JC, Shulman MJ, Bermingham EL, et al. (1985) Recruitment patterns in young French grunts, *Haemulon flavolineatum* (family Haemulidae) at St. Croix, U.S.V.I. *Fish Bull* 83: 413–426.
- Lindeman KC, Diaz GA, Serafy JE, Ault JS (1998) A spatial framework for assessing cross-shelf habitat use among newly settled grunts and snappers. *Proc Gulf Caribb Fish Inst* 50: 385–416.
- Lindeman KC, Pugliese R, Waugh GT, Ault JS (2000) Developmental patterns within a multispecies reef fishery: Management applications for essential fish habitats and protected areas. *Bull Mar Sci* 66: 929–956.
- Nagelkerken I, van der Velde G, Gorissen MW, Meijer GJ, van't Hof T, et al. (2000) Importance of mangroves, seagrass beds and the shallow coral reef as a nursery for important coral reef fishes, using a visual census technique. *Estuar Coast Shelf Sci* 51: 31–44.
- Hill RL (2002) Post-settlement processes and recruitment dynamics in the white grunt, *Haemulon plumieri* Lacépède (Pisces; Haemulidae). Ph.D. Dissertation. Puerto Rico: University of Puerto Rico-Mayaguez. pp. 152.
- Jordan LKB, Gilliam DS, Sherman RL, Arena PT, Harttung FM, et al. (2004) Spatial and temporal recruitment patterns of juvenile grunts (*Haemulon* spp.) in South Florida. *Proc Gulf Caribb Fish Inst* 55: 322–336.
- Grol MGG, Dorenbosch M, Kokkelmans EMG, Nagelkerken I (2008) Mangroves and seagrass beds do not enhance growth of early juveniles of a coral reef fish. *Mar Ecol Prog Ser* 366: 137–146.
- Huijbers CM, Mollee EM, Nagelkerken I (2008) Post-larval French grunts (*Haemulon flavolineatum*) distinguish between seagrass, mangrove and coral reef water: Implications for recognition of potential nursery habitats. *J Exp Mar Biol Ecol* 357: 134–139.
- Lindeman KC, Lee TN, Wilson WD, Claro R, Ault JS (2001) Transport of larvae originating in Southwest Cuba and the Dry Tortugas: Evidence for partial retention in grunts and snappers. *Proc Gulf Caribb Fish Inst* 52: 732–747.
- Lindeman KC, Richards WJ (2006) Grunts: Haemulidae. In: Richards WJ, editor. *Guide to the Early Stages of Atlantic Fishes*. Boca Raton: CRC Press. pp. 1597–1645.
- Lindeman KC (1986) Development of larvae of the French grunt, *Haemulon flavolineatum*, and comparative development of twelve species of western Atlantic *Haemulon* (Percoidae, Haemulidae). *Bull Mar Sci* 39: 673–716.
- Victor BC (1991) Settlement strategies and biogeography of reef fishes. In: Sale P, editor. *The Ecology of Fishes on Coral Reefs*. San Diego: Academic Press. pp. 231–260.
- Ogden JC, Ehrlich PR (1977) The behavior of heterotypic resting schools of juvenile grunts (Pomadasyidae). *Mar Biol* 42: 273–280.
- Pitcher TJ, Parrish JK (1993) Functions of shoaling behaviour in teleosts. In: Pitcher TJ, editor. *Behaviour of Teleost Fishes*, 2nd edition. London: Chapman and Hall. pp. 363–437.
- Lindeman KC, Snyder DB (1999) Nearshore hardbottom fishes of southeast Florida and effects of habitat burial caused by dredging. *Fish. Bull.* 97, 508–525.
- Adams AJ, Ebersole JP (2002) Use of back-reef lagoon habitats by coral reef fishes. *Mar Ecol Prog Ser* 228: 213–226.
- Adams AJ, Ebersole JP (2004) Processes influencing recruitment inferred from distributions of coral reef fishes. *Bull Mar Sci* 75: 93–104.
- Appeldoorn RS, Aguilar-Perera A, Bouwmeester BLK, Dennis GD, Hill RL, et al. (2009) Movement of fishes (Grunts: Haemulidae) across the coral reef seascape: A review of scales, patterns and processes. *Caribb J Sci* 45: 304–316.
- Bohnsack JA (1989) Are high densities of fishes at artificial reefs the result of habitat limitation or behavioral preference? *Bull Mar Sci* 44: 631–645.
- Hixon MA, Beets JP (1989) Shelter characteristics and Caribbean fish assemblages: Experiments with artificial reefs. *Bull Mar Sci* 44: 666–680.

## Acknowledgments

The authors are grateful for many Nova Southeastern University graduate students, for their involvement in data collection and project setup. The efforts of David Gilliam during construction of the reefs cannot be understated. David Snyder provided valuable insight on data analysis. We also thank the competent crew of the R/V *Steffen* and Capt. L. Robinson. Brian Walker supplied the image in Figure 1. We greatly appreciate the three anonymous reviewers for their comments and Lucy Howey-Jordan and A. Kirk Kilfoyle for edits. This is NCRI contribution #151.

## Author Contributions

Conceived and designed the experiments: LKBJ RES KCL. Performed the experiments: LKBJ RES KCL. Analyzed the data: LKBJ. Contributed reagents/materials/analysis tools: LKBJ RES. Wrote the paper: LKBJ.

43. Beets J (1997) Effects of a predatory fish on the recruitment and abundance of Caribbean coral reef fishes. *Mar Ecol Prog Ser* 148: 11–21.
44. Eklund AM (1997) The importance of post-settlement predation and reef resources limitation on the structure of reef fish assemblages. *Proc 8th Int Coral Reef Sym 2*: 1139–1142.
45. Gilliam DS (1999) Juvenile reef fish recruitment processes in South Florida: A multifactorial field experiment. Ph.D. Dissertation. Ft. Lauderdale, FL: Nova Southeastern University. pp. 111.
46. Sherman RL (2000) Studies on the roles of reef design and site selection in juvenile fish recruitment to small artificial reefs. Ph.D. Dissertation. Ft. Lauderdale, FL: Nova Southeastern University. pp. 173.
47. Baron RM, Jordan LKB, Spieler RE (2004) Characterization of the marine fish assemblage associated with the nearshore hardbottom of Broward County Florida, USA. *Estuar Coast Shelf Sci* 60: 431–433.
48. Jordan LKB, Gilliam DS, Spieler RE (2005) Reef fish assemblage structure affected by small-scale size and spatial variations of artificial patch reefs. *J Exp Mar Biol Ecol* 326: 170–186.
49. Nagelkerken I, Kleijnen S, Klop T, van den Brand RACJ, Cocheret de la Morinière E, et al. (2001) Dependence of Caribbean reef fishes on mangroves and seagrass beds as nursery habitats: A comparison of fish faunas between bays with and without mangroves/seagrass beds. *Mar Ecol Prog Ser* 214: 225–235.
50. Nagelkerken I, Roberts CM, Van Der Velde G, Dorenbosch M, Van Riel MC, et al. (2002) How important are mangroves and seagrass beds for coral-reef fish? The nursery hypothesis tested on an island scale. *Mar Ecol Prog Ser* 244: 299–305.
51. Arena PT, Jordan LKB, Spieler RE (2007) Fish assemblages on sunken vessels and natural reefs in southeast Florida, USA. *Hydrobiologia* 580: 157–171.
52. Dorenbosch M, van Riel MC, Nagelkerken I, van der Velde G (2004) The relationship of reef fish densities to the proximity of mangrove and seagrass nurseries. *Estuar Coast Shelf Sci* 60: 37–48.
53. McIvor CC, Odum WE (1988) Food, predation risk, and microhabitat selection in a marsh fish assemblage. *Ecology* 69: 1341–1351.
54. Chittaro PM, Usseglio P, Sale PF (2005) Variation in fish density, assemblage composition and relative rates of predation among mangrove, seagrass and coral reef habitats. *Environ Biol Fish* 72: 175–187.
55. Dorenbosch M, Grol MGG, de Groene A, van der Velde G, Nagelkerken I (2009) Piscivore assemblages and predation pressure affect relative safety of some back-reef habitats for juvenile fish in a Caribbean bay. *Mar Ecol Prog Ser* 379: 181–196.
56. Hixon MA, Beets JP (1993) Predation, prey refuges, and the structure of coral-reef fish assemblages. *Ecol Monogr* 63: 77–101.
57. Luckhurst BE, Luckhurst K (1978) Analysis of the influence of substrate variables on coral reef fish communities. *Mar Biol* 49: 317–323.
58. Bell JD, Galzin R (1984) Influence of live coral cover on coral-reef fish communities. *Mar Ecol Prog Ser* 15: 265–274.
59. Bohnsack JA, Harper DE, McClellan DB, Hulsbeck M (1994) Effects of reef size on colonization and assemblage structure of fishes at artificial reefs off southeastern Florida, USA. *Bull Mar Sci* 55: 796–823.
60. Walker BK, Jordan LKB, Spieler RE (2009) Relationship of reef fish assemblages and topographic complexity on southeastern Florida coral reef habitats. *J Coast Res* S153: 39–48.
61. Banks KW, Riegl BM, Richards VP, Walker BE, Helmle KP, et al. (2008) The reef tract of continental Southeast Florida (Miami-Dade, Broward, and Palm Beach Counties, USA). In: Riegl B, Dodge RE, editors. *Coral Reefs of the USA*. Dordrecht: Springer-Verlag. pp. 125–172.
62. Sherman RL, Gilliam DS, Spieler RE (2002) Artificial reef design: Void space, complexity, and attractants. *ICES J Mar Sci* 59: S196–S200.
63. Fisher RA (1925) *Statistical methods for research workers*. London: Oliver and Boyd. pp. 318.
64. Hurlbert SH (1984) Pseudoreplication and the design of ecological field experiments. *Ecol Monogr* 54: 187–211.
65. Connell SD (1997) Exclusion of predatory fish on a coral reef: The anticipation, pre-emption and evaluation of some caging artefacts. *J Exp Mar Biol Ecol* 213: 181–198.
66. Lo NC, Jacobson LD, Squire JL (1992) Indices of relative abundance for fish spotter data based on delta-lognormal models. *Can J Fish Aquat Sci* 49: 2515–2526.
67. Gaston K (1994) *Rarity*. London: Chapman & Hall. pp. 205.
68. Fletcher D, MacKenzie D, Villouta E (2005) Modeling skewed data with many zeros: A simple approach combining ordinary and logistic regression. *Environ Ecol Stat* 12: 45–54.
69. Serafy JE, Valle M, Faunce CH, Luo J (2007) Species-specific patterns of fish abundance and size along a subtropical mangrove shoreline: An application of the delta approach. *Bull Mar Sci* 80: 609–624.
70. Seber GAF (1982) *The Estimation of Animal Abundance and Related Parameters*, 2nd edition. New York: Macmillan. pp. 654.
71. Rice J (1995) *Mathematical statistics and data analysis*, 2nd edition. Belmont, Duxbury Press. pp. 597.
72. Livingston RJ (1982) Trophic organization of fishes in a coastal seagrass system. *Mar Ecol Prog Ser* 7: 1–12.
73. Spina AP (2000) Habitat partitioning in a patchy environment: Considering the role of intraspecific competition. *Environ Biol Fish* 57: 393–400.
74. Heck KL Jr, Crowder LB (1991) Habitat structure and predator-prey interactions in vegetated aquatic systems. In: Bell SS, McCoy ED, Mushinsky HR, editors. *Habitat Structure: The Physical Arrangements of Objects in Space*. London: Chapman and Hall. pp. 281–299.
75. Cocheret de la Morinière E, Nagelkerken I, van der Meij H, van der Velde G (2004) What attracts juvenile coral reef fish to mangroves: Habitat complexity or shade? *Mar Biol* 144: 139–145.
76. Horinouchi M, Mizuno N, Jo M, Fujita M, Sano M, Suzuki Y (2009) Seagrass habitat complexity does not always decrease foraging efficiencies of piscivorous fishes. *Mar Ecol Prog Ser* 377: 43–49.
77. Power RM (2003) Harvest of settlement stage reef fish for small-scale grow-out or stock enhancement: A feasibility study on the family Haemulidae. *Proc Gulf Caribb Fish Inst* 54: 401–412.
78. Randall JE (1967) Food habitats of reef fishes of the West Indies. *Stud Trop Oceanogr* 5: 665–847.
79. Rocha LA, Lindeman KC, Rocha CR, Lessios HA (2008) Historical biogeography and speciation in the reef fish genus *Haemulon* (Teleostei: Haemulidae). *Mol Phylogenet Evol* 48: 918–928.
80. Gilliam DS, Dodge RE, Spieler RE, Jordan LKB, Goergen EA (2008) *Marine Biological Monitoring in Broward County, Florida: Year 8 Annual Report*. Technical Report 08. (Prepared for: Broward County Board of County Commissioners of Environmental Protection Department, Biological Resource Division). pp. 105.
81. Hamner WM, Jones MS, Carleton JH, Hauri IR, Williams DMCB (1988) Zooplankton, planktivorous fish, and water currents on a Windward Reef face: Great Barrier Reef, Australia. *Bull Mar Sci* 42: 459–479.
82. Meekan MG, Fortier L (1996) Selection for fast growth during the larval life of Atlantic cod *Gadus morhua* on the Scotian shelf. *Mar Ecol Prog Ser* 137: 25–37.
83. Vigliola L, Meekan MG (2002) Size at hatching and planktonic growth determine post-settlement survivorship of a coral reef fish. *Oecologia* 131: 89–93.
84. Shulman MJ (1984) Resource limitation and recruitment patterns in a coral reef fish assemblage. *J Exp Mar Biol Ecol* 74: 85–109.
85. Connell SD, Kingsford MJ (1998) Spatial, temporal and habitat-related variation in the abundance of large predatory fish at One Tree Reef, Australia. *Coral Reefs* 17: 49–57.
86. Almany GR (2004) Differential effects of habitat complexity, predators and competitors on abundance of juvenile and adult coral reef fishes. *Oecologia* 141: 105–113.
87. Connell SD (1996) Variations in mortality of a coral-reef fish: Links with predator abundance. *Mar Biol* 126: 347–352.
88. Wahl DH (1995) Effect of habitat selection and behavior on vulnerability to predation of introduced fish. *Can J Fish Aquat Sci* 52: 2312–2319.
89. Crowder LB, Cooper WE (1982) Habitat structural complexity and the interaction between bluegills and their prey. *Ecology* 63: 1802–1813.
90. Hixon MA, Menge BA (1991) Species diversity: Prey refuges modify the interactive effects of predation and competition. *Theor Popul Biol* 39: 178–200.
91. Levin P, Petrik R, Malone J (1997) Interactive effects of habitat selection, food supply and predation on recruitment of an estuarine fish. *Oecologia* 112: 55–63.
92. Almany GR (2004) Does increased habitat complexity reduce predation and competition in coral reef fish assemblages? *Oikos* 106: 275–284.
93. Milinski M (1986) Constraints placed by predators on feeding behaviour. In: Pitcher TJ, editor. *The Behavior of Teleost Fishes*. London: Chapman and Hall. pp. 285–331.
94. Limouzy-Paris C, McGowan MF, Richards WJ, Umanan JP, Cha SS (1994) Diversity of fish larvae in the Florida Keys: Results from SEFCAR. *Bull Mar Sci* 54: 857–870.
95. D'Alessandro E, Sponaugle S, Lee TN (2007) Patterns and processes of larval fish supply to the coral reefs of the upper Florida Keys. *Mar Ecol Prog Ser* 331: 85–100.
96. Simpson SD, Meekan MG, McCauley RD, Jeffs A (2004) Attraction of settlement-stage coral reef fishes to reef noise. *Mar Ecol Prog Ser* 276: 263–268.
97. Power ME (1987) Predator avoidance by grazing fishes in temperate and tropical streams: Importance of stream depth and prey size. In: Kerfoot WC, Sih A, editors. *Predation: Direct and Indirect Impacts on Aquatic Communities*. Hanover: University Press of New England. pp. 333–351.
98. Petranks JW (1983) Fish predation: A factor affecting the spatial distribution of a stream-breeding salamander. *Copeia* 1983: 624–628.
99. Holmes TH, McCormick MI (2011) Response across a gradient: Behavioural reactions of newly settled fish to predation cues. *Anim Behav* 81: 543–550.
100. Kingsford MJ, Leis JM, Shanks A, Lindeman KC, Morgan SG, et al. (2002) Sensory environments, larval abilities and local self-recruitment. *Bull Mar Sci* 70: 309–340.
101. Bohnsack JA (1991) Habitat structure and the design of artificial reefs. In: Bell SS, McCoy ED, Mushinsky HR, editors. *Habitat Structure: The Physical Arrangement of Objects in Space*. London: Chapman and Hall. pp. 412–426.
102. Marnane MJ, Bellwood DR (2002) Diet and nocturnal foraging in cardinal-fishes (Apogonidae) at One Tree Reef, Great Barrier Reef, Australia. *Mar Ecol Prog Ser* 231: 261–268.
103. Carr MH, Hixon MA (1995) Predation effects on early post-settlement survivorship of coral-reef fishes. *Mar Ecol Prog Ser* 124: 31–42.
104. Theilacker GH, Lasker R (1974) Laboratory studies of predation by euphausiid shrimps on fish larvae. In: Blaxter JHS, editor. *The Early Life History of Fish*. New York: Springer-Verlag. pp. 287–299.
